# Supplementary material
Source: PubMed Central journal article supplement (PMC2186256)
Supplement: mmc1.pdf [file mmc1.pdf]

SUPPLEMENT 1 TABLE 1A: Aluminum models

| Ring | Edge type | Ext rot<br>( <i>E</i> ) | Int rot<br>( <i>I</i> ) | $\sum_{\text{half}} E$ | $\sum_{\text{half}} I$ | Dist of <i>E</i><br>( $\alpha$ ) | DAD<br>( <i>D</i> ) | Twist<br>( <i>T</i> ) | $\sum_{\text{half}} D$ | $\sum_{\text{half}} D/2$ | $\sum_{\text{half}} T$ |
|------|-----------|-------------------------|-------------------------|------------------------|------------------------|----------------------------------|---------------------|-----------------------|------------------------|--------------------------|------------------------|
| 611  |           |                         |                         |                        |                        |                                  |                     |                       |                        |                          |                        |
| pent | Sym       | 0.00                    | 0.00                    | -31.51                 | 0.00                   |                                  | 0.00                | 0.00                  | 31.51                  | 15.76                    | -15.76                 |
| hex  | Green     | -16.34                  | 12.03                   |                        |                        | 52%                              | 28.37               | -2.16                 |                        |                          |                        |
| hex  | Twist     | -15.17                  | -12.03                  |                        |                        | 48%                              | 3.14                | -13.60                |                        |                          |                        |
| hex  | Sym       | 0.00                    | 0.00                    | 31.51                  | 0.00                   |                                  | 0.00                | 0.00                  | -31.51                 | -15.76                   | 15.76                  |
| hex  | Twist     | 15.17                   | 12.03                   |                        |                        |                                  | -3.14               | 13.60                 |                        |                          |                        |
| hex  | Green     | 16.34                   | -12.03                  |                        |                        |                                  | -28.37              | 2.16                  |                        |                          |                        |
|      | Sum       |                         |                         | 0.00                   | 0.00                   |                                  | 0.00                | 0.00                  | 0.00                   | 0.00                     | 0.00                   |
| 621  |           |                         |                         |                        |                        |                                  |                     |                       |                        |                          |                        |
| pent | Red       | -8.65                   | 8.37                    | -48.45                 | -3.78                  | 18%                              | 17.02               | -0.14                 | 44.67                  | 22.34                    | -26.12                 |
| hex  | Green     | -21.98                  | 3.76                    |                        |                        | 45%                              | 25.74               | -9.11                 |                        |                          |                        |
| hex  | Twist     | -17.82                  | -15.91                  |                        |                        | 37%                              | 1.91                | -16.87                |                        |                          |                        |
| hex  | Twist     | 17.82                   | 15.91                   | 48.45                  | 3.78                   |                                  | -1.91               | 16.87                 | -44.67                 | -22.34                   | 26.12                  |
| hex  | Green     | 21.98                   | -3.76                   |                        |                        |                                  | -25.74              | 9.11                  |                        |                          |                        |
| pent | Red       | 8.65                    | -8.37                   |                        |                        |                                  | -17.02              | 0.14                  |                        |                          |                        |
|      | Sum       |                         |                         | 0.00                   | 0.00                   |                                  | 0.00                | 0.00                  | 0.00                   | 0.00                     | 0.00                   |
| 622  |           |                         |                         |                        |                        |                                  |                     |                       |                        |                          |                        |
| hex  | Sym       | 0.00                    | 0.00                    | -28.68                 | 0.00                   |                                  | 0.00                | 0.00                  | 28.68                  | 14.34                    | -14.34                 |
| pent | Twist     | -10.73                  | -11.22                  |                        |                        | 37%                              | -0.49               | -10.98                |                        |                          |                        |
| hex  | Green     | -17.95                  | 11.22                   |                        |                        | 63%                              | 29.17               | -3.37                 |                        |                          |                        |
| hex  | Sym       | 0.00                    | 0.00                    | 28.68                  | 0.00                   |                                  | 0.00                | 0.00                  | -28.68                 | -14.34                   | 14.34                  |
| hex  | Green     | 17.95                   | -11.22                  |                        |                        |                                  | -29.17              | 3.37                  |                        |                          |                        |
| pent | Twist     | 10.73                   | 11.22                   |                        |                        |                                  | 0.49                | 10.98                 |                        |                          |                        |
|      | Sum       |                         |                         | 0.00                   | 0.00                   |                                  | 0.00                | 0.00                  | 0.00                   | 0.00                     | 0.00                   |
| 623  |           |                         |                         |                        |                        |                                  |                     |                       |                        |                          |                        |
| pent | Sym       | 0.00                    | 0.00                    | 0.00                   | 0.00                   |                                  | 0.00                | 0.00                  | 0.00                   | 0.00                     | 0.00                   |
| hex  | Green     | -12.90                  | 14.55                   |                        |                        |                                  | 27.45               | 0.83                  |                        |                          |                        |
| hex  | Green     | 12.90                   | -14.55                  |                        |                        |                                  | -27.45              | -0.83                 |                        |                          |                        |
| pent | Sym       | 0.00                    | 0.00                    | 0.00                   | 0.00                   |                                  | 0.00                | 0.00                  | 0.00                   | 0.00                     | 0.00                   |
| hex  | Green     | -12.90                  | 14.55                   |                        |                        |                                  | 27.45               | 0.83                  |                        |                          |                        |
| hex  | Green     | 12.90                   | -14.55                  |                        |                        |                                  | -27.45              | -0.83                 |                        |                          |                        |
|      | Sum       |                         |                         | 0.00                   | 0.00                   |                                  | 0.00                | 0.00                  | 0.00                   | 0.00                     | 0.00                   |

SUPPLEMENT 1 TABLE 1A: Aluminum models (continued)

| Ring | Edge type | Ext rot<br>( <i>E</i> ) | Int rot<br>( <i>I</i> ) | $\sum_{\text{half}} E$ | $\sum_{\text{half}} I$ | Dist of <i>E</i><br>( $\alpha$ ) | DAD<br>( <i>D</i> ) | Twist<br>( <i>T</i> ) | $\sum_{\text{half}} D$ | $\sum_{\text{half}} D/2$ | $\sum_{\text{half}} T$ |
|------|-----------|-------------------------|-------------------------|------------------------|------------------------|----------------------------------|---------------------|-----------------------|------------------------|--------------------------|------------------------|
| 631  |           |                         |                         |                        |                        |                                  |                     |                       |                        |                          |                        |
| pent | Sym       | 0.00                    | 0.00                    | -42.82                 | 0.00                   |                                  | 0.00                | 0.00                  | 42.82                  | 21.41                    | -21.41                 |
| pent | Red       | -16.65                  | 0.03                    |                        |                        | 39%                              | 16.68               | -8.31                 |                        |                          |                        |
| hex  | Green     | -26.17                  | -0.03                   |                        |                        | 61%                              | 26.14               | -13.10                |                        |                          |                        |
| hex  | Sym       | 0.00                    | 0.00                    | 42.82                  | 0.00                   |                                  | 0.00                | 0.00                  | -42.82                 | -21.41                   | 21.41                  |
| hex  | Green     | 26.17                   | 0.03                    |                        |                        |                                  | -26.14              | 13.10                 |                        |                          |                        |
| pent | Red       | 16.65                   | -0.03                   |                        |                        |                                  | -16.68              | 8.31                  |                        |                          |                        |
|      | Sum       |                         |                         | 0.00                   | 0.00                   |                                  | 0.00                | 0.00                  | 0.00                   | 0.00                     | 0.00                   |
| 632  |           |                         |                         |                        |                        |                                  |                     |                       |                        |                          |                        |
| pent | Red       | -14.94                  | 3.57                    | -18.91                 | -0.11                  |                                  | 18.51               | -5.69                 | 18.80                  | 9.40                     | -9.51                  |
| hex  | Green     | -29.50                  | 2.13                    |                        |                        |                                  | 31.63               | -13.69                |                        |                          |                        |
| hex  | Green     | 25.53                   | -5.81                   |                        |                        |                                  | -31.34              | 9.86                  |                        |                          |                        |
| pent | Twist     | 3.89                    | 3.85                    | 19.00                  | 0.16                   |                                  | -0.04               | 3.87                  | -18.84                 | -9.42                    | 0.07                   |
| hex  | Twist     | 2.81                    | 1.84                    |                        |                        |                                  | -0.97               | 2.33                  |                        |                          |                        |
| pent | Red       | 12.30                   | -5.53                   |                        |                        |                                  | -17.83              | 3.39                  |                        |                          |                        |
|      | Sum       |                         |                         | 0.09                   | 0.05                   |                                  | -0.04               | 0.07                  | -0.04                  | -0.02                    | -9.44                  |
| 641  |           |                         |                         |                        |                        |                                  |                     |                       |                        |                          |                        |
| hex  | Green     | -18.29                  | 8.87                    | -43.14                 | 0.40                   | 42%                              | 27.16               | -4.71                 | 43.54                  | 21.77                    | -21.37                 |
| pent | Red       | -17.58                  | -0.41                   |                        |                        | 41%                              | 17.17               | -9.00                 |                        |                          |                        |
| pent | Twist     | -7.27                   | -8.06                   |                        |                        | 17%                              | -0.79               | -7.67                 |                        |                          |                        |
| pent | Twist     | 7.27                    | 8.06                    | 43.14                  | -0.40                  |                                  | 0.79                | 7.67                  | -43.54                 | -21.77                   | 21.37                  |
| pent | Red       | 17.58                   | 0.41                    |                        |                        |                                  | -17.17              | 9.00                  |                        |                          |                        |
| hex  | Green     | 18.29                   | -8.87                   |                        |                        |                                  | -27.16              | 4.71                  |                        |                          |                        |
|      | Sum       |                         |                         | 0.00                   | 0.00                   |                                  | 0.00                | 0.00                  | 0.00                   | 0.00                     | 0.00                   |
| 642  |           |                         |                         |                        |                        |                                  |                     |                       |                        |                          |                        |
| hex  | Sym       | 0.00                    | 0.00                    | 0.00                   | 0.00                   |                                  | 0.00                | 0.00                  | 0.00                   | 0.00                     | 0.00                   |
| pent | Red       | 3.60                    | -14.06                  |                        |                        |                                  | -17.66              | -5.23                 |                        |                          |                        |
| pent | Red       | -3.60                   | 14.06                   |                        |                        |                                  | 17.66               | 5.23                  |                        |                          |                        |
| hex  | Sym       | 0.00                    | 0.00                    | 0.00                   | 0.00                   |                                  | 0.00                | 0.00                  | 0.00                   | 0.00                     | 0.00                   |
| pent | Red       | 3.60                    | -14.06                  |                        |                        |                                  | -17.66              | -5.23                 |                        |                          |                        |
| pent | Red       | -3.60                   | 14.06                   |                        |                        |                                  | 17.66               | 5.23                  |                        |                          |                        |
|      | Sum       |                         |                         | 0.00                   | 0.00                   |                                  | 0.00                | 0.00                  | 0.00                   | 0.00                     | 0.00                   |

SUPPLEMENT 1 TABLE 1A: Aluminum models (continued)

| Ring | Edge type | Ext rot<br>( <i>E</i> ) | Int rot<br>( <i>I</i> ) | $\sum_{\text{half}} E$ | $\sum_{\text{half}} I$ | Dist of <i>E</i><br>( $\alpha$ ) | DAD<br>( <i>D</i> ) | Twist<br>( <i>T</i> ) | $\sum_{\text{half}} D$ | $\sum_{\text{half}} D/2$ | $\sum_{\text{half}} T$ |
|------|-----------|-------------------------|-------------------------|------------------------|------------------------|----------------------------------|---------------------|-----------------------|------------------------|--------------------------|------------------------|
| 643  |           |                         |                         |                        |                        |                                  |                     |                       |                        |                          |                        |
| pent | Sym       | 0.00                    | 0.00                    | -18.20                 | 0.00                   |                                  | 0.00                | 0.00                  | 18.20                  | 9.10                     | -9.10                  |
| hex  | Twist     | -9.96                   | -9.42                   |                        |                        | 55%                              | 0.54                | -9.69                 |                        |                          |                        |
| pent | Red       | -8.24                   | 9.42                    |                        |                        | 45%                              | 17.66               | 0.59                  |                        |                          |                        |
| pent | Sym       | 0.00                    | 0.00                    | 18.20                  | 0.00                   |                                  | 0.00                | 0.00                  | -18.20                 | -9.10                    | 9.10                   |
| pent | Red       | 8.24                    | -9.42                   |                        |                        |                                  | -17.66              | -0.59                 |                        |                          |                        |
| hex  | Twist     | 9.96                    | 9.42                    |                        |                        |                                  | -0.54               | 9.69                  |                        |                          |                        |
|      | Sum       |                         |                         | 0.00                   | 0.00                   |                                  | 0.00                | 0.00                  | 0.00                   | 0.00                     | 0.00                   |
| 651  |           |                         |                         |                        |                        |                                  |                     |                       |                        |                          |                        |
| hex  | Sym       | 0.00                    | 0.00                    | -18.01                 | 0.00                   |                                  | 0.00                | 0.00                  | 18.01                  | 9.01                     | -9.01                  |
| pent | Twist     | -8.12                   | -8.40                   |                        |                        | 45%                              | -0.28               | -8.26                 |                        |                          |                        |
| pent | Red       | -9.89                   | 8.40                    |                        |                        | 55%                              | 18.29               | -0.75                 |                        |                          |                        |
| pent | Sym       | 0.00                    | 0.00                    | 18.01                  | 0.00                   |                                  | 0.00                | 0.00                  | -18.01                 | -9.01                    | 9.01                   |
| pent | Red       | 9.89                    | -8.40                   |                        |                        |                                  | -18.29              | 0.75                  |                        |                          |                        |
| pent | Twist     | 8.12                    | 8.40                    |                        |                        |                                  | 0.28                | 8.26                  |                        |                          |                        |
|      | Sum       |                         |                         | 0.00                   | 0.00                   |                                  | 0.00                | 0.00                  | 0.00                   | 0.00                     | 0.00                   |
| 511  |           |                         |                         |                        |                        |                                  |                     |                       |                        |                          |                        |
| pent | Sym       | 0.00                    | 0.00                    |                        |                        |                                  | 0.00                | 0.00                  |                        |                          |                        |
| hex  | Red       | -12.60                  | 5.09                    | -21.17                 | -3.15                  | 60%                              | 17.69               | -3.76                 | 18.02                  | 9.01                     | -12.16                 |
| hex  | Twist     | -8.57                   | -8.24                   |                        |                        | 40%                              | 0.33                | -8.41                 |                        |                          |                        |
| hex  | Twist     | 8.57                    | 8.24                    | 21.17                  | 3.15                   |                                  | -0.33               | 8.41                  |                        |                          |                        |
| hex  | Red       | 12.60                   | -5.09                   |                        |                        |                                  | -17.69              | 3.76                  | -17.69                 | -8.85                    | 3.76                   |
|      | Sum       |                         |                         | 0.00                   | 0.00                   |                                  | 0.00                | 0.00                  | 0.33                   | 0.16                     | -8.41                  |
| 521  |           |                         |                         |                        |                        |                                  |                     |                       |                        |                          |                        |
| pent | BLUE      | -10.88                  | 3.03                    | -30.50                 | 1.16                   | 36%                              | 13.91               | -3.93                 | 31.66                  | 15.83                    | -14.67                 |
| hex  | Red       | -19.62                  | -1.87                   |                        |                        | 64%                              | 17.75               | -10.75                |                        |                          |                        |
| hex  | Sym       | 0.00                    | 0.00                    |                        |                        |                                  | 0.00                | 0.00                  |                        |                          |                        |
| hex  | Red       | 19.62                   | 1.87                    | 30.50                  | -1.16                  |                                  | -17.75              | 10.75                 | -31.66                 | -15.83                   | 14.67                  |
| pent | BLUE      | 10.88                   | -3.03                   |                        |                        |                                  | -13.91              | 3.93                  |                        |                          |                        |
|      | Sum       |                         |                         | 0.00                   | 0.00                   |                                  | 0.00                | 0.00                  | 0.00                   | 0.00                     | 0.00                   |
| 522  |           |                         |                         |                        |                        |                                  |                     |                       |                        |                          |                        |
| pent | Twist     | -5.98                   | -6.23                   | -14.09                 | 3.52                   | 42%                              | -0.25               | -6.11                 | 17.61                  | 8.81                     | -5.29                  |
| hex  | Red       | -8.11                   | 9.75                    |                        |                        | 58%                              | 17.86               | 0.82                  |                        |                          |                        |
| hex  | Red       | 8.30                    | -9.55                   | 14.10                  | -3.52                  |                                  | -17.85              | -0.63                 | -17.62                 | -8.81                    | 5.29                   |
| pent | Twist     | 5.44                    | 5.71                    |                        |                        |                                  | 0.27                | 5.58                  |                        |                          |                        |
| hex  | Sym*      | 0.36                    | 0.32                    |                        |                        |                                  | -0.04               | 0.34                  |                        |                          |                        |
|      | Sum       |                         |                         | 0.01                   | 0.00                   |                                  | 0.03                | -0.34                 | -0.01                  | -0.01                    | 0.00                   |

**SUPPLEMENT 1 TABLE 1A: Aluminum models (continued)**

| Ring | Edge type | Ext rot<br>( <i>E</i> ) | Int rot<br>( <i>I</i> ) | $\sum_{\text{half}} E$ | $\sum_{\text{half}} I$ | Dist of <i>E</i><br>( $\alpha$ ) | DAD<br>( <i>D</i> ) | Twist<br>( <i>T</i> ) | $\sum_{\text{half}} D$ | $\sum_{\text{half}} D/2$ | $\sum_{\text{half}} T$ |
|------|-----------|-------------------------|-------------------------|------------------------|------------------------|----------------------------------|---------------------|-----------------------|------------------------|--------------------------|------------------------|
| 531  |           |                         |                         |                        |                        |                                  |                     |                       |                        |                          |                        |
| pent | Sym       | 0.00                    | 0.00                    |                        |                        |                                  |                     |                       |                        |                          |                        |
| pent | BLUE      | -15.05                  | -1.24                   | -31.01                 | 0.76                   | 49%                              | 13.81               | -8.15                 | 31.77                  | 15.89                    | -15.13                 |
| hex  | Red       | -15.96                  | 2.00                    |                        |                        | 51%                              | 17.96               | -6.98                 |                        |                          |                        |
| hex  | Red       | 15.96                   | -2.00                   | 31.01                  | -0.76                  |                                  | -17.96              | 6.98                  | -31.77                 | -15.89                   | 15.13                  |
| pent | BLUE      | 15.05                   | 1.24                    |                        |                        |                                  | -13.81              | 8.15                  |                        |                          |                        |
|      | Sum       |                         |                         | 0.00                   | 0.00                   |                                  | 0.00                | 0.00                  | 0.00                   | 0.00                     | 0.00                   |
| 532  |           |                         |                         |                        |                        |                                  |                     |                       |                        |                          |                        |
| hex  | Twist     | -5.99                   | -5.70                   | -11.20                 | 3.52                   | 53%                              | 0.29                | -5.85                 | 14.72                  | 7.36                     | -3.84                  |
| pent | BLUE      | -5.21                   | 9.22                    |                        |                        | 47%                              | 14.43               | 2.01                  |                        |                          |                        |
| pent | BLUE      | 5.21                    | -9.22                   | 11.20                  | -3.52                  |                                  | -14.43              | -2.01                 | -14.72                 | -7.36                    | 3.84                   |
| hex  | Twist     | 5.99                    | 5.70                    |                        |                        |                                  | -0.29               | 5.85                  |                        |                          |                        |
| pent | Sym       | 0.00                    | 0.00                    |                        |                        |                                  | 0.00                | 0.00                  |                        |                          |                        |
|      | Sum       |                         |                         | 0.00                   | 0.00                   |                                  | 0.00                | 0.00                  | 0.00                   | 0.00                     | 0.00                   |
| 541  |           |                         |                         |                        |                        |                                  |                     |                       |                        |                          |                        |
| pent | Twist     | -6.27                   | -6.52                   | -16.82                 | -2.49                  | 37%                              | -0.25               | -6.40                 | 14.33                  | 7.17                     | -9.66                  |
| pent | BLUE      | -10.55                  | 4.03                    |                        |                        | 63%                              | 14.58               | -3.26                 |                        |                          |                        |
| hex  | Sym       | 0.00                    | 0.00                    |                        |                        |                                  | 0.00                | 0.00                  |                        |                          |                        |
| pent | BLUE      | 10.55                   | -4.03                   | 16.82                  | 2.49                   |                                  | -14.58              | 3.26                  | -14.33                 | -7.17                    | 9.66                   |
| pent | Twist     | 6.27                    | 6.52                    |                        |                        |                                  | 0.25                | 6.40                  |                        |                          |                        |
|      | Sum       |                         |                         | 0.00                   | 0.00                   |                                  | 0.00                | 0.00                  | 0.25                   | 0.00                     | 0.00                   |

**Supplement 1 Table 1A. Angles of interest (in degrees) associated with all of the edges of all the hex-Rings and pent-Rings composed of aluminum atoms.**

Edge lengths were constrained to 2.5 Å. Internal angles were constrained to 108° in pentagonal faces and 120° in hexagonal faces. Electrostatic interactions were turned off. The equilibrium geometry of each Ring structure was determined by molecular mechanics calculations (MMFF94) (20-24) in Spartan '04. External rotation (*E*) and internal rotation (*I*) were measured. DAD (*D*) and twist (*T*) were calculated from *E* and *I* according to Eqs. 1 and 2.

SUPPLEMENT 1 TABLE 1B: Carbon models

| Ring  | Edge type | Ext rot ( $E$ ) | Int rot ( $I$ ) | $\sum_{\text{half}} E$ | $\sum_{\text{half}} I$ | Dist of $E$ ( $\alpha$ ) | DAD ( $D$ ) | Twist ( $T$ ) | $\sum_{\text{half}} D$ | $\sum_{\text{half}} D/2$ | $\sum_{\text{half}} T$ |
|-------|-----------|-----------------|-----------------|------------------------|------------------------|--------------------------|-------------|---------------|------------------------|--------------------------|------------------------|
| 611   |           |                 |                 |                        |                        |                          |             |               |                        |                          |                        |
| pent  | Sym       | 0.00            | 0.00            | -32.19                 | 0.02                   |                          | 0.00        | 0.00          | 32.21                  | 16.11                    | -                      |
| 16.09 |           |                 |                 |                        |                        |                          |             |               |                        |                          |                        |
| hex   | Green     | -18.27          | 10.00           |                        |                        | 57%                      | 28.27       | -4.14         |                        |                          |                        |
| hex   | Twist     | -13.92          | -9.98           |                        |                        | 43%                      | 3.94        | -11.95        |                        |                          |                        |
| hex   | Sym       | 0.00            | 0.00            | 32.19                  | -0.02                  |                          | 0.00        | 0.00          | -32.21                 | -16.11                   | 16.09                  |
| hex   | Twist     | 13.92           | 9.98            |                        |                        |                          | -3.94       | 11.95         |                        |                          |                        |
| hex   | Green     | 18.27           | -10.00          |                        |                        |                          | -28.27      | 4.14          |                        |                          |                        |
|       | Sum       |                 |                 | 0.00                   | 0.00                   |                          | 0.00        | 0.00          | 0.00                   | 0.00                     | 0.00                   |
| 621   |           |                 |                 |                        |                        |                          |             |               |                        |                          |                        |
| pent  | Red       | -13.58          | 3.99            | -51.23                 | -4.32                  | 27%                      | 17.57       | -4.80         | 46.91                  | 23.46                    | -27.78                 |
| hex   | Green     | -22.50          | 4.31            |                        |                        | 44%                      | 26.81       | -9.10         |                        |                          |                        |
| hex   | Twist     | -15.15          | -12.62          |                        |                        | 30%                      | 2.53        | -13.89        |                        |                          |                        |
| hex   | Twist     | 15.15           | 12.62           | 51.23                  | 4.32                   |                          | -2.53       | 13.89         | -46.91                 | -23.46                   | 27.78                  |
| hex   | Green     | 22.50           | -4.31           |                        |                        |                          | -26.81      | 9.10          |                        |                          |                        |
| pent  | Red       | 13.58           | -3.99           |                        |                        |                          | -17.57      | 4.80          |                        |                          |                        |
|       | Sum       |                 |                 | 0.00                   | 0.00                   |                          | 0.00        | 0.00          | 0.00                   | 0.00                     | 0.00                   |
| 622   |           |                 |                 |                        |                        |                          |             |               |                        |                          |                        |
| hex   | Sym       | 0.00            | 0.00            | -27.83                 | -0.01                  |                          | 0.00        | 0.00          | 27.82                  | 13.91                    | -13.92                 |
| pent  | Twist     | -8.50           | -8.74           |                        |                        | 31%                      | -0.24       | -8.62         |                        |                          |                        |
| hex   | Green     | -19.33          | 8.73            |                        |                        | 69%                      | 28.06       | -5.30         |                        |                          |                        |
| hex   | Sym       | 0.00            | 0.00            | 27.83                  | 0.01                   |                          | 0.00        | 0.00          | -27.82                 | -13.91                   | 13.92                  |
| hex   | Green     | 19.33           | -8.73           |                        |                        |                          | -28.06      | 5.30          |                        |                          |                        |
| pent  | Twist     | 8.50            | 8.74            |                        |                        |                          | 0.24        | 8.62          |                        |                          |                        |
|       | Sum       |                 |                 | 0.00                   | 0.00                   |                          | 0.00        | 0.00          | 0.00                   | 0.00                     | 0.00                   |
| 623   |           |                 |                 |                        |                        |                          |             |               |                        |                          |                        |
| pent  | Sym       | 0.00            | 0.00            | 0.00                   | 0.00                   |                          | 0.00        | 0.00          | 0.00                   | 0.00                     | 0.00                   |
| hex   | Green     | -12.74          | 13.78           |                        |                        |                          | 26.52       | 0.52          |                        |                          |                        |
| hex   | Green     | 12.74           | -13.78          |                        |                        |                          | -26.52      | -0.52         |                        |                          |                        |
| pent  | Sym       | 0.00            | 0.00            | 0.00                   | 0.00                   |                          | 0.00        | 0.00          | 0.00                   | 0.00                     | 0.00                   |
| hex   | Green     | -12.74          | 13.78           |                        |                        |                          | 26.52       | 0.52          |                        |                          |                        |
| hex   | Green     | 12.74           | -13.78          |                        |                        |                          | -26.52      | -0.52         |                        |                          |                        |
|       | Sum       |                 |                 | 0.00                   | 0.00                   |                          | 0.00        | 0.00          | 0.00                   | 0.00                     | 0.00                   |

SUPPLEMENT 1 TABLE 1B: Carbon models (continued)

| Ring | Edge type | Ext rot<br>( <i>E</i> ) | Int rot<br>( <i>I</i> ) | $\sum_{\text{half}} E$ | $\sum_{\text{half}} I$ | Dist of <i>E</i><br>( $\alpha$ ) | DAD<br>( <i>D</i> ) | Twist<br>( <i>T</i> ) | $\sum_{\text{half}} D$ | $\sum_{\text{half}} D/2$ | $\sum_{\text{half}} T$ |
|------|-----------|-------------------------|-------------------------|------------------------|------------------------|----------------------------------|---------------------|-----------------------|------------------------|--------------------------|------------------------|
| 631  |           |                         |                         |                        |                        |                                  |                     |                       |                        |                          |                        |
| pent | Sym       | 0.00                    | 0.00                    | -43.84                 | -0.01                  |                                  | 0.00                | 0.00                  | 43.83                  | 21.92                    | -21.93                 |
| pent | Red       | -18.91                  | -2.37                   |                        |                        | 43%                              | 16.54               | -10.64                |                        |                          |                        |
| hex  | Green     | -24.93                  | 2.36                    |                        |                        | 57%                              | 27.29               | -11.29                |                        |                          |                        |
| hex  | Sym       | 0.00                    | 0.00                    | 43.84                  | 0.01                   |                                  | 0.00                | 0.00                  | -43.83                 | -21.92                   | 21.93                  |
| hex  | Green     | 24.93                   | -2.36                   |                        |                        |                                  | -27.29              | 11.29                 |                        |                          |                        |
| pent | Red       | 18.91                   | 2.37                    |                        |                        |                                  | -16.54              | 10.64                 |                        |                          |                        |
|      | Sum       |                         |                         | 0.00                   | 0.00                   |                                  | 0.00                | 0.00                  | 0.00                   | 0.00                     | 0.00                   |
| 632  |           |                         |                         |                        |                        |                                  |                     |                       |                        |                          |                        |
| pent | Red       | -12.51                  | 5.05                    | -19.71                 | -1.37                  |                                  | 17.56               | -3.73                 | 18.34                  | 9.17                     | -10.54                 |
| hex  | Green     | -17.12                  | 9.69                    |                        |                        |                                  | 26.81               | -3.72                 |                        |                          |                        |
| hex  | Green     | 9.92                    | -16.11                  |                        |                        |                                  | -26.03              | -3.10                 |                        |                          |                        |
| pent | Twist     | 8.00                    | 7.72                    | 19.63                  | 1.31                   |                                  | -0.28               | 7.86                  | -18.32                 | -9.16                    | -0.07                  |
| hex  | Twist     | 6.80                    | 7.05                    |                        |                        |                                  | 0.25                | 6.93                  |                        |                          |                        |
| pent | Red       | 4.83                    | -13.46                  |                        |                        |                                  | -18.29              | -4.32                 |                        |                          |                        |
|      | Sum       |                         |                         | -0.08                  | -0.06                  |                                  | 0.02                | -0.07                 | 0.02                   | 0.01                     | -10.61                 |
| 641  |           |                         |                         |                        |                        |                                  |                     |                       |                        |                          |                        |
| hex  | Green     | -13.16                  | 15.45                   | -44.25                 | 1.24                   | 30%                              | 28.61               | 1.15                  | 45.49                  | 22.75                    | -21.51                 |
| pent | Red       | -18.93                  | -1.27                   |                        |                        | 43%                              | 17.66               | -10.10                |                        |                          |                        |
| pent | Twist     | -12.16                  | -12.94                  |                        |                        | 27%                              | -0.78               | -12.55                |                        |                          |                        |
| pent | Twist     | 12.16                   | 12.94                   | 44.25                  | -1.24                  |                                  | 0.78                | 12.55                 | -45.49                 | -22.75                   | 21.51                  |
| pent | Red       | 18.93                   | 1.27                    |                        |                        |                                  | -17.66              | 10.10                 |                        |                          |                        |
| hex  | Green     | 13.16                   | -15.45                  |                        |                        |                                  | -28.61              | -1.15                 |                        |                          |                        |
|      | Sum       |                         |                         | 0.00                   | 0.00                   |                                  | 0.00                | 0.00                  | 0.00                   | 0.00                     | 0.00                   |
| 642  |           |                         |                         |                        |                        |                                  |                     |                       |                        |                          |                        |
| hex  | Sym       | 0.00                    | 0.00                    | 0.00                   | 0.00                   |                                  | 0.00                | 0.00                  | 0.00                   | 0.00                     | 0.00                   |
| pent | Red       | 6.89                    | -10.95                  |                        |                        |                                  | -17.84              | -2.03                 |                        |                          |                        |
| pent | Red       | -6.89                   | 10.95                   |                        |                        |                                  | 17.84               | 2.03                  |                        |                          |                        |
| hex  | Sym       | 0.00                    | 0.00                    | 0.00                   | 0.00                   |                                  | 0.00                | 0.00                  | 0.00                   | 0.00                     | 0.00                   |
| pent | Red       | 6.89                    | -10.95                  |                        |                        |                                  | -17.84              | -2.03                 |                        |                          |                        |
| pent | Red       | -6.89                   | 10.95                   |                        |                        |                                  | 17.84               | 2.03                  |                        |                          |                        |
|      | Sum       |                         |                         | 0.00                   | 0.00                   |                                  | 0.00                | 0.00                  | 0.00                   | 0.00                     | 0.00                   |

SUPPLEMENT 1 TABLE 1B: Carbon models (continued)

| Ring | Edge type | Ext rot<br>( <i>E</i> ) | Int rot<br>( <i>I</i> ) | $\sum_{\text{half}} E$ | $\sum_{\text{half}} I$ | Dist of <i>E</i><br>( $\alpha$ ) | DAD<br>( <i>D</i> ) | Twist<br>( <i>T</i> ) | $\sum_{\text{half}} D$ | $\sum_{\text{half}} D/2$ | $\sum_{\text{half}} T$ |
|------|-----------|-------------------------|-------------------------|------------------------|------------------------|----------------------------------|---------------------|-----------------------|------------------------|--------------------------|------------------------|
| 643  |           |                         |                         |                        |                        |                                  |                     |                       |                        |                          |                        |
| pent | Sym       | 0.00                    | 0.00                    | -18.64                 | -0.01                  |                                  | 0.00                | 0.00                  | 18.63                  | 9.32                     | -9.33                  |
| hex  | Twist     | -9.29                   | -8.70                   |                        |                        | 50%                              | 0.59                | -9.00                 |                        |                          |                        |
| pent | Red       | -9.35                   | 8.69                    |                        |                        | 50%                              | 18.04               | -0.33                 |                        |                          |                        |
| pent | Sym       | 0.00                    | 0.00                    | 18.64                  | 0.01                   |                                  | 0.00                | 0.00                  | -18.63                 | -9.32                    | 9.33                   |
| pent | Red       | 9.35                    | -8.69                   |                        |                        |                                  | -18.04              | 0.33                  |                        |                          |                        |
| hex  | Twist     | 9.29                    | 8.70                    |                        |                        |                                  | -0.59               | 9.00                  |                        |                          |                        |
|      | Sum       |                         |                         | 0.00                   | 0.00                   |                                  | 0.00                | 0.00                  | 0.00                   | 0.00                     | 0.00                   |
| 651  |           |                         |                         |                        |                        |                                  |                     |                       |                        |                          |                        |
| hex  | Sym       | -0.03                   | -0.04                   | -18.36                 | 0.04                   |                                  | -0.01               | -0.04                 | 18.40                  | 9.20                     | -9.16                  |
| pent | Twist     | -8.55                   | -8.91                   |                        |                        | 47%                              | -0.36               | -8.73                 |                        |                          |                        |
| pent | Red       | -9.78                   | 8.99                    |                        |                        | 53%                              | 18.77               | -0.40                 |                        |                          |                        |
| pent | Sym       | -0.10                   | -0.12                   | 18.38                  | -0.04                  |                                  | -0.02               | -0.11                 | -18.42                 | -9.21                    | 9.17                   |
| pent | Red       | 9.94                    | -8.83                   |                        |                        |                                  | -18.77              | 0.56                  |                        |                          |                        |
| pent | Twist     | 8.54                    | 8.91                    |                        |                        |                                  | 0.37                | 8.73                  |                        |                          |                        |
|      | Sum       |                         |                         | 0.02                   | 0.00                   |                                  | -0.02               | 0.01                  | -0.02                  | -0.01                    | 0.01                   |
| 511  |           |                         |                         |                        |                        |                                  |                     |                       |                        |                          |                        |
| pent | Sym       | 0.00                    | 0.00                    |                        |                        |                                  | 0.00                | 0.00                  |                        |                          |                        |
| hex  | Red       | -14.93                  | 2.60                    | -19.57                 | -1.61                  | 76%                              | 17.53               | -6.17                 | 17.96                  | 8.98                     | -10.59                 |
| hex  | Twist     | -4.64                   | -4.21                   |                        |                        | 24%                              | 0.43                | -4.43                 |                        |                          |                        |
| hex  | Twist     | 4.64                    | 4.21                    | 19.57                  | 1.61                   |                                  | -0.43               | 4.43                  |                        |                          |                        |
| hex  | Red       | 14.93                   | -2.60                   |                        |                        |                                  | -17.53              | 6.17                  | -17.53                 | -8.77                    | 6.17                   |
|      | Sum       |                         |                         | 0.00                   | 0.00                   |                                  | 0.00                | 0.00                  | 0.43                   | 0.22                     | -4.43                  |
| 521  |           |                         |                         |                        |                        |                                  |                     |                       |                        |                          |                        |
| pent | BLUE      | -14.93                  | -0.89                   | -32.64                 | -0.34                  | 46%                              | 14.04               | -7.91                 | 32.30                  | 16.15                    | -16.49                 |
| hex  | Red       | -17.71                  | 0.55                    |                        |                        | 54%                              | 18.26               | -8.58                 |                        |                          |                        |
| hex  | Sym       | 0.00                    | 0.00                    |                        |                        |                                  | 0.00                | 0.00                  |                        |                          |                        |
| hex  | Red       | 17.71                   | -0.55                   | 32.64                  | 0.34                   |                                  | -18.26              | 8.58                  | -32.30                 | -16.15                   | 16.49                  |
| pent | BLUE      | 14.93                   | 0.89                    |                        |                        |                                  | -14.04              | 7.91                  |                        |                          |                        |
|      | Sum       |                         |                         | 0.00                   | 0.00                   |                                  | 0.00                | 0.00                  | 0.00                   | 0.00                     | 0.00                   |
| 522  |           |                         |                         |                        |                        |                                  |                     |                       |                        |                          |                        |
| pent | Twist     | -5.86                   | -6.12                   | -13.94                 | 3.99                   | 42%                              | -0.26               | -5.99                 | 17.93                  | 8.97                     | -4.98                  |
| hex  | Red       | -8.08                   | 10.11                   |                        |                        | 58%                              | 18.19               | 1.02                  |                        |                          |                        |
| hex  | Red       | 7.97                    | -10.24                  | 13.93                  | -4.00                  |                                  | -18.21              | -1.14                 | -17.93                 | -8.97                    | 4.97                   |
| pent | Twist     | 6.19                    | 6.45                    |                        |                        |                                  | 0.26                | 6.32                  |                        |                          |                        |
| hex  | Sym*      | -0.23                   | -0.21                   |                        |                        |                                  | 0.02                | -0.22                 |                        |                          |                        |
|      | Sum       |                         |                         | -0.01                  | -0.01                  |                                  | -0.02               | 0.21                  | 0.00                   | 0.00                     | -0.01                  |

SUPPLEMENT 1 TABLE 1B: Carbon models (continued)

| Ring | Edge type | Ext rot ( $E$ ) | Int rot ( $I$ ) | $\sum_{\text{half}} E$ | $\sum_{\text{half}} I$ | Dist of $E$ ( $\alpha$ ) | DAD ( $D$ ) | Twist ( $T$ ) | $\sum_{\text{half}} D$ | $\sum_{\text{half}} D/2$ | $\sum_{\text{half}} T$ |
|------|-----------|-----------------|-----------------|------------------------|------------------------|--------------------------|-------------|---------------|------------------------|--------------------------|------------------------|
| 531  |           |                 |                 |                        |                        |                          |             |               |                        |                          |                        |
| pent | Sym       | 0.00            | 0.00            |                        |                        |                          | 0.00        | 0.00          |                        |                          |                        |
| pent | BLUE      | -15.81          | -2.05           | -30.96                 | 1.27                   | 51%                      | 13.76       | -8.93         | 32.23                  | 16.12                    | -14.85                 |
| hex  | Red       | -15.15          | 3.32            |                        |                        | 49%                      | 18.47       | -5.92         |                        |                          |                        |
| hex  | Red       | 15.15           | -3.32           | 30.96                  | -1.27                  |                          | -18.47      | 5.92          | -32.23                 | -16.12                   | 14.85                  |
| pent | BLUE      | 15.81           | 2.05            |                        |                        |                          | -13.76      | 8.93          |                        |                          |                        |
|      | Sum       |                 |                 | 0.00                   | 0.00                   |                          | 0.00        | 0.00          | 0.00                   | 0.00                     | 0.00                   |
| 532  |           |                 |                 |                        |                        |                          |             |               |                        |                          |                        |
| hex  | Twist     | -6.51           | -6.35           | -11.38                 | 3.29                   | 57%                      | 0.16        | -6.43         | 14.67                  | 7.34                     | -4.05                  |
| pent | BLUE      | -4.87           | 9.64            |                        |                        | 43%                      | 14.51       | 2.39          |                        |                          |                        |
| pent | BLUE      | 5.15            | -9.24           | 11.35                  | -3.29                  |                          | -14.39      | -2.05         | -14.64                 | -7.32                    | 4.03                   |
| hex  | Twist     | 5.76            | 5.31            |                        |                        |                          | -0.45       | 5.54          |                        |                          |                        |
| pent | Sym*      | 0.44            | 0.64            |                        |                        |                          | 0.20        | 0.54          |                        |                          |                        |
|      | Sum       |                 |                 | -0.03                  | 0.00                   |                          | -0.17       | -0.56         | 0.03                   | 0.02                     | -0.01                  |
| 541  |           |                 |                 |                        |                        |                          |             |               |                        |                          |                        |
| pent | Twist     | -5.55           | -5.82           | -16.42                 | -2.22                  | 34%                      | -0.27       | -5.69         | 14.20                  | 7.10                     | -9.32                  |
| pent | BLUE      | -10.87          | 3.60            |                        |                        | 66%                      | 14.47       | -3.64         |                        |                          |                        |
| hex  | Sym       | 0.00            | 0.00            |                        |                        |                          | 0.00        | 0.00          |                        |                          |                        |
| pent | BLUE      | 10.87           | -3.60           | 16.42                  | 2.22                   |                          | -14.47      | 3.64          | -14.20                 | -7.10                    | 9.32                   |
| pent | Twist     | 5.55            | 5.82            |                        |                        |                          | 0.27        | 5.69          |                        |                          |                        |
|      | Sum       |                 |                 | 0.00                   | 0.00                   |                          | 0.00        | 0.00          | 0.27                   | 0.00                     | 0.00                   |

**Supplement 1 Table 1B. Angles of interest (in degrees) associated with all of the edges of all the hex-Rings and pent-Rings composed of carbon atoms.**

Edge lengths were constrained to 1.43 Å. Internal angles were constrained to 108° in pentagonal faces and 120° in hexagonal faces. All bonds were single bonds, but electrostatic interactions were turned off. The equilibrium geometry of each Ring structure was determined by molecular mechanics calculations (MMFF94) (20-24) in Spartan '04. External rotation ( $E$ ) and internal rotation ( $I$ ) were measured. DAD ( $D$ ) and twist ( $T$ ) were calculated from  $E$  and  $I$  according to Eqs. 1 and 2.
